# Supplementary material
Source: MDPI journal article supplement (https://www.mdpi.com/2077-0383/10/24/5958)
Supplement: s1 [file s1]

Archive with 1 entries (1 files):
- jcm-1478051-supplementary.pdf
